# Supplementary material
Source: Springer Nature journal article supplement (https://www.springermedizin.de/resource/supplementary/12933_2011_465_MOESM3_ESM.pdf/9538536)

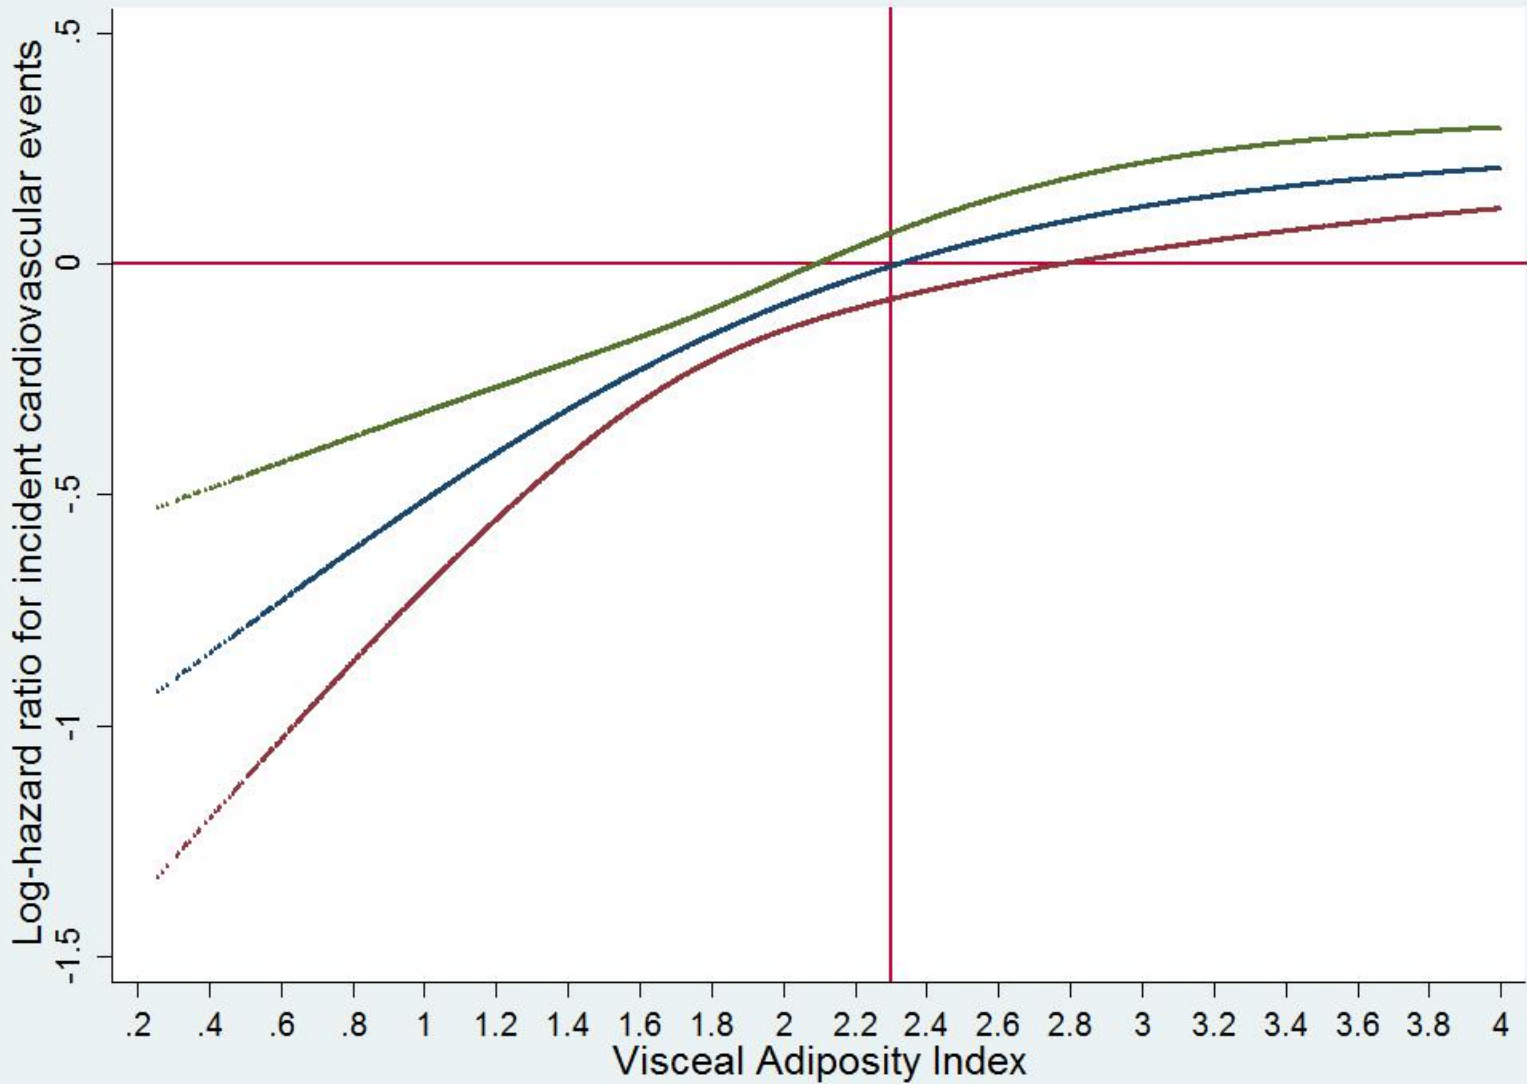

Supplement: MOESM3 [file 9538536]
